# Supplementary material for: An electrochemical ratiometric biosensor for the detection of dopamine based on an MXene-Au nanocomposite
Source: Royal Society of Chemistry journal article supplement (doi:10.1039/d3cc03661h), 2023-01-01
Supplement: d3cc03661h1.pdf [file d3cc03661h1.pdf]

Supporting information

**An electrochemical ratiometric biosensor for the detection of  
dopamine based on MXene-Au nanocomposite**

*Wen-Jie Jing, Fei-Fei Li, Yu Liu, Rong-Na Ma, Wei Zhang, Lei Shang, Xiao-Jian Li,  
Qing-Wang Xue, Huai-Sheng Wang\*, Li-Ping Jia\**

College of Chemistry and Chemical Engineering, Liaocheng University, Liaocheng,  
252000, China

\*Corresponding author.

Email: [jialiping@lcu.edu.cn](mailto:jialiping@lcu.edu.cn); [hswang@lcu.edu.cn](mailto:hswang@lcu.edu.cn).

## **1. Experimental sections**

### **Regents and instruments**

5 mg·mL<sup>-1</sup> multilayer Ti<sub>3</sub>C<sub>2</sub>T<sub>x</sub> MXene solution was purchased from Beike 2D Materials Co. Ltd (Suzhou, China). Methylene blue, HAuCl<sub>4</sub>·3H<sub>2</sub>O, and dopamine were bought from Aladdin Reagent (Shanghai) Co. Ltd. K<sub>3</sub>[Fe(CN)<sub>6</sub>], Na<sub>2</sub>HPO<sub>4</sub>, NaH<sub>2</sub>PO<sub>4</sub>, and KCl were purchased from Shanghai Macklin Biochemical Co., Ltd. The above reagents were analytically pure and used without further treatment. Milli-Q water purification system was employed to produce the ultrapure water (18.2 MΩ·cm) used in this work.

Transmission electron microscopy (TEM) images were observed on a JEM-2100 instrument. X-ray diffraction (XRD) measurements were conducted on a Rigaku Smartlab diffractometer with Cu Kα radiation. All the electrochemical measurements were performed on a CHI660E electrochemical station (Shanghai CH Instruments Co. Ltd) with three-electrode system: modified glassy carbon electrode as working electrode, platinum wire as counter electrode and Ag/AgCl (3 M KCl) as reference electrode.

### **Synthesis of MXene-Au nanocomposite**

MXene-Au was prepared based on the reported reference [24] with minor modification. First, 0.2 mL MXene solution (5 mg·mL<sup>-1</sup>) was dropped into 4.8 mL water and sonicated for 30 min. Next, 1.0 mL HAuCl<sub>4</sub> (20 mM) was dropped into the above solution. After reacting for 5 min under continuously stirring, the mixture was centrifugated and washed three times with water. Finally, MXene-Au nanocomposite was obtained by drying the precipitate at 60°C for 12 h in vacuum.

### **Synthesis of MB-MXene-Au nanocomposite**

1.0 mg MXene-Au nanocomposite was added into 1.0 mL 25 μM methylene blue (MB) solution and sonicated for 1 h. The superfluous MB was removed by centrifugation and washing.

### **Fabrication of MB-MXene-Au/GCE**

First, glassy carbon electrode (GCE) was polished with Al<sub>2</sub>O<sub>3</sub> suspension on polishing cloth. After being washed with water and ethanol, the performance of GCE

was tested by scanning the cycle voltammetry of  $[\text{Fe}(\text{CN})_6]^{3-/4-}$  in 0.10 M KCl solution. Then the electrode was rinsed well with water and dried with nitrogen. Next, 6  $\mu\text{L}$  1  $\text{mg}\cdot\text{mL}^{-1}$  MB-MXene-Au solution was dropped on the electrode surface and dried naturally. Finally, 6  $\mu\text{L}$  0.025% Nafion was added on MB-MXene-Au/GCE to immobilize MB-MXene-Au on the electrode firmly.

### Electrochemical measurements

Nafion/MB-MXene-Au/GCE was immersed into 5 mL pH 6.0 PBS containing different concentration of dopamine for electrochemical detection.

Differential pulse voltammetry (DPV) was measured with the parameters: +0.5 ~ -0.5V scan range, 4 mV potential increment, 50 mV pulse width, 50 mV amplitude, and 0.5 s pulse period. The electrochemical impedance spectroscopy (EIS) was carried out in 0.1 M KCl solution containing 20 mM  $[\text{Fe}(\text{CN})_6]^{3-/4-}$  with a frequency range from 0.1 Hz to 100 kHz. The amplitude of the applied sine wave potential was 5 mV and the formal potential of the system was set at +0.22 V.

### 2. Figures

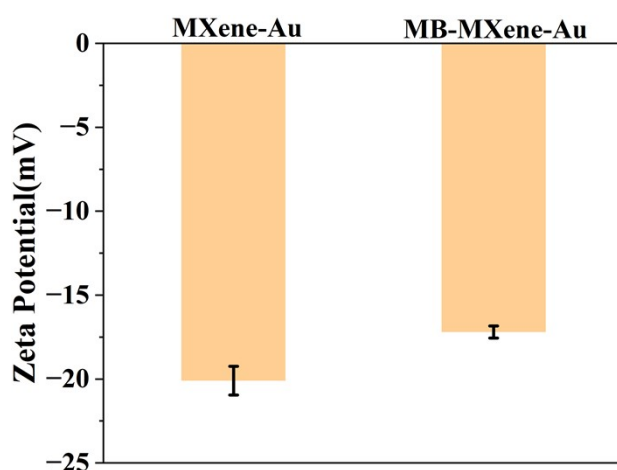

Figure S1. Zeta potential of MXene-Au and MB-MXene-Au

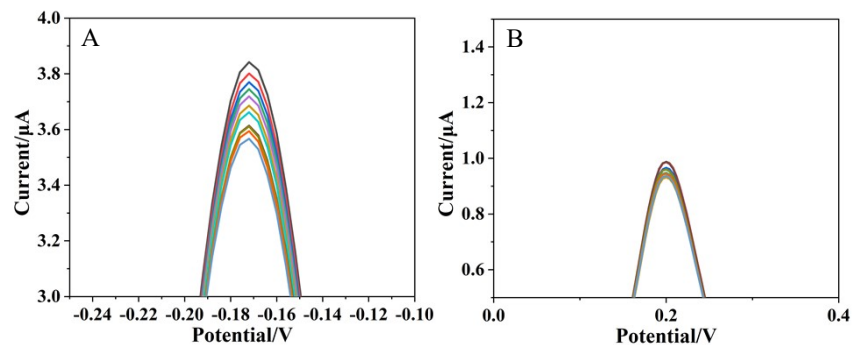

Figure S2. Stability study of the ratiometric biosensor. (A) and (B) are the local enlargement of DPV for MB and DA, respectively.

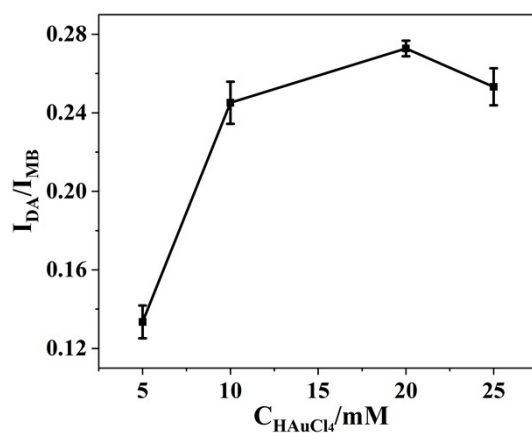

Figure S3. Effect of  $\text{HAuCl}_4$  concentration on the performance of the ratiometric biosensor.

### 3. Tables

Table S1. Comparison of of DA detection based on various modified nanomaterials

| Modified material                                              | Detection technique    | Linear range                     | Detection limit               | Reference        |
|----------------------------------------------------------------|------------------------|----------------------------------|-------------------------------|------------------|
| Perylene diimide-Ti <sub>3</sub> C <sub>2</sub> T <sub>x</sub> | DPV                    | 100-1000 $\mu$ M                 | 0.24 $\mu$ M                  | 1                |
| Ionic liquid/Ti <sub>3</sub> C <sub>2</sub> Cl <sub>2</sub>    | DPV                    | 10-2000 $\mu$ M                  | 0.70 $\mu$ M                  | 2                |
| Ti <sub>3</sub> C <sub>2</sub> T <sub>x</sub> /DNA/Pd/Pt       | DPV                    | 0.2-1000 $\mu$ M                 | 0.03 $\mu$ M                  | 3                |
| Ti <sub>3</sub> C <sub>2</sub> /G-MWCNTs/ZnO                   | DPV                    | 0.01-30 $\mu$ M                  | 3.3 nM                        | 4                |
| Ti <sub>3</sub> C <sub>2</sub> /Holey graphene                 | DPV                    | 0.5-50 $\mu$ M                   | 0.06 $\mu$ M                  | 5                |
| SWCNT                                                          | DPV                    | 0.4-150.0 $\mu$ M                | 0.22 $\mu$ M                  | 6                |
| S-doped graphene                                               | DPV                    | 0.2-12 $\mu$ M                   | 0.015 $\mu$ M                 | 7                |
| N-doped reduced GO                                             | DPV                    | 0.5-150 $\mu$ M                  | 0.41 $\mu$ M                  | 8                |
| 3D N-doped graphene                                            | DPV                    | 1-1000 $\mu$ M                   | 0.26 $\mu$ M                  | 9                |
| MXene-ERHG <sup>a</sup>                                        | DPV                    | 0.3-35 $\mu$ M                   | 0.071 $\mu$ M                 | 10               |
| Cu- MOFs-MWCNTs                                                | Ratiometric DPV        | 0.3-40 $\mu$ M                   | 0.026 $\mu$ M                 | 11               |
| MB <sup>b</sup> /BP <sup>c</sup> -CNT                          | Ratiometric DPV        | 0.5–350 $\mu$ M                  | 0.15 $\mu$ M                  | 12               |
| MWCNT                                                          | Ratiometric DPV        | 1.0–20.0 $\mu$ M                 | 0.23 $\mu$ M                  | 13               |
| MnO <sub>2</sub> /MWCNT                                        | Ratiometric DPV        | 1.0–50.0                         | 0.8                           | 14               |
| p(XA) <sup>d</sup> /Au/Cu-TCPP                                 | Ratiometric DPV        | 5 - 125 $\mu$ M                  | 1.0                           | 15               |
| MIPs <sup>e</sup> /pThi <sup>f</sup> /Au-Cu alloy              | Ratiometric DPV        | 0.3–100 $\mu$ M                  | 0.1 $\mu$ M                   | 16               |
| <b>MB-MXene-Au</b>                                             | <b>Ratiometric DPV</b> | <b>0.1–100 <math>\mu</math>M</b> | <b>0.04 <math>\mu</math>M</b> | <b>This work</b> |

Note:

<sup>a</sup>ERHG: electrochemically reduced holey graphene;

<sup>b</sup>MB: methylene blue;

<sup>c</sup>BP: 4-(pyren-4-yl)-N-(4-(4,4,5,5-tetramethyl-1,3,2-dioxaborolan-2-yl)phenyl)butanamide;

<sup>d</sup>pXA: polyxanthurenic acid;

<sup>e</sup>MIPs: molecularly imprinted polymers (MIPs);

<sup>f</sup>pThi: polythionine.

### References:

- 1 U. Amara, M.T. Mehran, B. Sarfaraz, K. Mahmood, A. Hayat, M. Nasir, S. Riaz, and M.H. Nawaz, *Microchim Acta.*, 2021, **188**, 230.
- 2 U. Amara, B. Sarfraz, K. Mahmood, M.T. Mehran, N. Muhammad, A. Hayat, and M.H. Nawaz, *Microchim Acta.*, 2022, **189**, 64.
- 3 J. Zheng, B. Wang, A. Ding, B. Weng, and J. Chen, *J. Electroanal. Chem.*, 2018, **816**, 189-194.

- 4 M. Ni, J. Chen, C. Wang, Y. Wang, L. Huang, W. Xiong, P. Zhao, Y. Xie, and J. Fei, *Microchem. J.*, 2022, **178**, 107410.
- 5 Y. Zhang, L. Zhang, C. Li, J. Han, W. Huang, J. Zhou, and Y. Yang, *Microchem. J.*, 2022, **181**, 107713.
- 6 B. Habibi, M. Jahanbakhshi, and M.H. Pournaghi-Azar, *Electrochim. Acta.*, 2011, **56**, 2888-2894.
- 7 M. Li, C. Liu, H. Zhao, H. An, H. Cao, Y. Zhang, and Z. Fan, *Carbon.*, 2015, **86**, 197–206.
- 8 P. Wiench, Z. González, R. Menéndez, B. Grzyb, and G. Gryglewicz, *Sensor. Actuator. B Chem.*, 2018, **257**, 143–153.
- 9 J. Jiang, D. Ding, J. Wang, X. Lin, and G. Diao, *Analyst.*, 2021, **146**, 964–970.
- 10 L. Zhang, C. Li, Y. Yang, J. Han, W. Huang, J. Zhou, and Y. Zhang, *Talanta.*, 2022, **247**, 123614.
- 11 S. Luo, Y. Wang, and X. Kan, *Microchem. J.*, 2022, **172**, 106903.
- 12 Y. Yang, H. Dong, H. Yin, Y. Zhang, Y. Zhou, M. Xu, and X. Wang, *Microchem. J.*, 2022, **178**, 107344..
- 13 L. Wang, Y. Wang, and Q. Zhuang, *J. Electroanal. Chem.*, 2019, **851**, 113446.
- 14 Y. Wang, L. Wang, and Q. Zhuang, *J. Alloys Compd.*, 2019, **802**, 326-334.
- 15 Z. Qiu, T. Yang, R. Gao, G. Jie, and W. Hou, *J. Electroanal. Chem.*, 2019, **835**, 123-129.
- 16 J. Yang, Y. Hu, and Y. Li, *Biosens. Bioelectron.*, 2019, **135**, 224-230
